1 **Title:** CovidCounties - an interactive, real-time tracker of the COVID-19 pandemic at the level of  
2 US counties

3

4 **Authors:** Douglas Arneson<sup>1</sup>, Matthew Elliott<sup>1</sup>, Arman Mosenia<sup>1,2</sup>, Boris Oskotsky<sup>1</sup>, Rohit  
5 Vashisht<sup>1</sup>, Travis Zack<sup>1,3</sup>, Paul Bleicher<sup>4</sup>, Atul J. Butte<sup>1,5,6</sup>, Vivek A. Rudrapatna<sup>1,7</sup>

6

7 **Affiliations:**

8 1. Bakar Computational Health Sciences Institute, University of California, San Francisco, CA

9 2. School of Medicine, University of California, San Francisco, CA

10 3. Department of Medicine, University of California, San Francisco, CA

11 4. Evident Health Strategies, West Newton, MA

12 5. Department of Pediatrics, University of California, San Francisco, CA

13 6. Center for Data-Driven Insights and Innovation, University of California Health, Oakland, CA

14 7. Division of Gastroenterology, Department of Medicine, University of California, San Francisco,  
15 CA

16

17 **Corresponding Author:**

18 Vivek A. Rudrapatna: 550 16th Street, 4th Floor #4748, San Francisco, CA 94158-2549. tel:

19 415.514.0542. email: [Vivek.Rudrapatna@ucsf.edu](mailto:Vivek.Rudrapatna@ucsf.edu)

20

21

22

23

24 **Abstract:**

25 Management of the COVID-19 pandemic has proven to be a significant challenge to policy  
26 makers. This is in large part due to uneven reporting and the absence of open-access  
27 visualization tools to present local trends and infer healthcare needs. Here we report the  
28 development of CovidCounties.org, an interactive web application that depicts daily disease  
29 trends at the level of US counties using time series plots and maps. This application is  
30 accompanied by a manually curated dataset that catalogs all major public policy actions made  
31 at the state-level, as well as technical validation of the primary data. Finally, the underlying  
32 code for the site is also provided as open source, enabling others to validate and learn from this  
33 work.

34

35 **Introduction:**

36

37 The disease known as COVID-19 was first reported in December of 2019 in Wuhan,  
38 China<sup>1</sup>. Three months later it was declared a pandemic by the WHO, and since then its death  
39 toll has reached over 150,000 while infecting over 2 million people across 210 countries  
40 worldwide<sup>2</sup>. Additionally, the pandemic has disrupted the daily lives of billions and has incurred  
41 significant socioeconomic costs at the global level.

42 In the US, the very assessment of the disease's impact has been challenged by  
43 limitations in accurate data capture and analysis. Variable testing, uneven reporting, barriers to  
44 data sharing, and a lack of easy-to-use analytic tools have all contributed to a lack of clarity in  
45 establishing and trending the state of the pandemic. As a consequence, policy makers at all  
46 levels have been forced to make decisions of great socioeconomic consequence in the face of  
47 significant uncertainty.

48 To improve the accessibility of basic COVID-19-related information in the US, especially  
49 by the general public and policymakers without a data science background, we report the  
50 creation of a new interactive visualization tool that depicts daily disease trends at the level of  
51 individual US counties. This web application features the novel reuse of several publicly  
52 available sources of data while also introducing a new, manually curated dataset accompanying  
53 this manuscript. This site features several unique views, including local doubling times and  
54 estimated ICU bed requirements by county. Additionally, we report the technical validation of  
55 the primary data (counts per county per day) against other official- and commonly used sources  
56 of data.

57

58 **Methods:**

59

60 Data sources: Data on state-wide and county-level counts were obtained from The New York  
61 Times<sup>3</sup> via their *github* repository (<https://github.com/nytimes/covid-19-data>). County-wise  
62 population data were obtained from the US Census<sup>4</sup> using the *R* package *tidycensus*<sup>5</sup>. Data on  
63 ICU bed availability per county was obtained from Kaiser Health News<sup>6</sup>.

64

65 As per The New York Times, cases and deaths reported from New York, Kings, Queens, Bronx  
66 and Richmond counties were assigned to New York City. Similarly, Cass, Clay, Jackson and Platte  
67 counties in Missouri were assigned to Kansas City. When a patient's county of residence was  
68 unknown or pending many state departments reported these cases as coming from "unknown"  
69 counties. Cases reported from unknown counties were only included at the state level.

70

71 Data related to state-wide implementation of social-distancing policies were manually curated  
72 by web search and independently reviewed by a second author; disagreements were rare and  
73 resolved by discussion. Government websites were prioritized as sources of truth where  
74 feasible; otherwise, news reports covering state-wide proclamations were used. All citations  
75 are captured in the open data file accompanying this manuscript.

76 [<https://datadryad.org/stash/share/whGecW9DWYmoAVMDdAHNF0z712Vbxrj9YwI5QKRAWUs>  
77 ]. These data were up to date and confirmed as of the date of data deposit: April 19, 2020.

78

79 Ground truth data used for validation were manually curated from the websites of multiple  
80 state departments of public health as well as Corona Data Scraper

81 [<https://coronadatascraper.com/>], a commonly used resource for aggregating county-level  
82 tracking of COVID-19 over time. Citations of the validation data are included in the data file  
83 accompanying this manuscript.

84 [<https://datadryad.org/stash/share/whGecW9DWYmoAVMDdAHNF0z712Vbxrj9YwI5QKRAWUs>  
85 ]

86

87 Descriptive statistics on all datasets except that of the US Census and validation data are  
88 reported in Table 1.

89

90 Doubling Time: Doubling time was calculated for each state and county by taking the reciprocal  
91 of difference between the log (base 2) case counts corresponding to adjacent days, then  
92 applying the *R* function *loess* for smoothing. The input of this model required a minimum of 8

93 days of data where the minimum number of cases was greater than 10. Regularization was  
94 performed by replacing extreme doubling times (>500 days) with the average of the  
95 surrounding values.

96

97 ICU Bed Occupancy Model: We incorporated parameters related to rates of hospitalization and  
98 ICU admission from work previously published by Ferguson et al.<sup>7</sup>. Although simpler than other  
99 models, it fit publicly available county-level ICU bed data in California well and was easier to  
100 understand for the user than more complicated models proposed<sup>8-11</sup>. This model assumed a  
101 4.4% rate of hospitalization among all new cases, a 30% rate of intensive care unit admission  
102 among hospitalized patients, and a 9-day average length of stay (time until discharge or death).

103

104 Web Application Development and Deployment: See Figure 1 for an overall schematic of the  
105 web application. The source code was written in *R* (4.1.0)<sup>12</sup> using the *shiny*<sup>13</sup>, *shinyjs*<sup>14</sup>,  
106 *tidyverse*<sup>15</sup> and *plotly*<sup>16</sup> packages. Software version control was achieved using Docker. The  
107 entire software code for the site is publicly available on *github*  
108 (<https://github.com/vivical/ButteLabCOVID>) and *dockerhub*  
109 ([https://hub.docker.com/r/pupster90/covid\\_tracker](https://hub.docker.com/r/pupster90/covid_tracker)). The web hosting was organized as a  
110 unified data share between all instances running *R shiny* code and controlled by a load balancer  
111 using an auto-scaling mechanism. The web environment is hosted by Amazon Web Services and  
112 is located at [covidcounties.org](https://covidcounties.org).

113

## 114 **Results:**

115

116 CovidCounties derives a majority of its data from The New York Times Coronavirus github page  
117 [<https://github.com/nytimes/covid-19-data>] which is updated daily with cases and deaths  
118 reported in each state and county from the previous day. This time series dataset was derived  
119 from a variety of governmental sources. However, to our knowledge this data has never been  
120 formally validated against other reputed sources of COVID-19 reporting including state and  
121 local departments of public health.

122

123 First, we demonstrate the high concordance of cumulative cases and deaths calculated and  
124 displayed in CovidCounties at the county level by directly comparing these to numbers reported  
125 by the Departments of Public Health in California and Connecticut (Figure 2A, 2B). These two  
126 states were chosen because they both publicly report the daily counts of cases requiring  
127 hospitalization or intensive care at the county level.  $R^2$  rates corresponding to the concordance  
128 between predicted and actual counts ranged from 0.86 to 1. To our knowledge, California is  
129 only state in the US to report county-wide ICU bed utilization rates. We found a high degree of  
130 concordance ( $R^2 = 0.87$ ) with minimal model bias (Figure 2A), indicating a fairly high degree of  
131 explained variation despite a relatively simplistic model.

132

133 An  $R^2$  of 1 was specifically found with respect to cumulative cases and deaths in Connecticut  
134 (Figure 2B), suggesting a shared common data source.

135

136 We compared the concordance of our data with that reported by Corona Data Scraper  
137 [<https://coronadatascraper.com/>], another widely used source of aggregated publicly-available  
138 COVID-19 timeseries data at the county level. We found very high concordance ( $R^2 = 0.95-0.97$ )  
139 for deaths and cases respectively with no model bias (Figure 2C).

140

141 Lastly, we compared the concordance of our predicted hospitalizations, cases, and deaths from  
142 our dataset against data reported by 8 different State Departments of Public Health (Figure 2D).  
143 We noted some relative over-estimation of our estimated hospitalized counts against that  
144 actual data reported by multiple State Departments of Public Health. Nonetheless concordance  
145 was very high ( $R^2 = 0.97-0.99$ ).

146

147 Descriptive statistics on the New York Times data are provided in Table 1. 23 states reported  
148 cases with unknown counties of residence, however, in all states except Rhode Island these  
149 cases made up less than 4% of the total cases in that state (Table 1). The inability to map these  
150 cases to specific counties may explain some of the discrepancies between the New York Times

151 data used in CovidCounties and the curated data from state public health departments and the  
152 Corona Data Scraper.

153

154 The data and tools incorporated into CovidCounties support the effectiveness of social  
155 distancing measures, consistent with several events that have occurred following the initial  
156 release of the website. South Dakota, one of six states which does not have a statewide shelter  
157 in place order (as of April 15, 2020), has experienced rapid case growth following an exposure  
158 at a meat plant (Figure 3A). This has accounted for more than half of the state's cases<sup>17</sup> as of  
159 April 15, 2020, with the fastest statewide doubling time of 4.5 days (Figure 3B). By contrast,  
160 states with early shelter in place times like Arizona on March 11, 2020, California on March 19,  
161 2020, and Connecticut on March 20, 2020 (Figure 3A) have much slower doubling times of 19.3  
162 days, 22.8 days, and 12.7 days respectively (Figure 3B).

163

164 The web application located at [covidcounties.org](https://covidcounties.org) was first released to the public on April 3,  
165 2020. It features two sections: a line plot depicting time-series trends in disease dynamics, and  
166 a map depicting geospatial relationships (Figure 4). The site has had over 15 thousand unique  
167 site in the first week as of April 11, 2020, most of whom accessed the website using a mobile  
168 device.

169

## 170 **Discussion:**

171

172 The effective management of the COVID-19 pandemic has been hindered by both inaccurate  
173 data collection and reporting, as well as relative inaccessibility by non-data scientists. Taken  
174 together, these difficulties have impeded optimal policymaking by both government (imposing  
175 social distancing policies) and health systems (anticipating ICU utilization) alike. Consequently,  
176 responses across institutions have been highly variable and with varying degrees of success. To  
177 help address these gaps we developed [covidcounties.org](https://covidcounties.org) and performed the technical  
178 validation reported in this work.

179

180 The curation of COVID-19 case and death counts by The New York Times is an impressive effort  
181 by over 60 reporters to collect, curate and analyze a constantly growing and evolving dataset<sup>3</sup>.  
182 However, they acknowledge that the underlying data is extremely fragmented and comes from  
183 thousands of different sources at both the state and county levels and thus is inherently limited  
184 by accuracy, consistency, and timeliness. The New York Times notes that reported cases have  
185 been corrected mere hours after the initial report and there have been numerous instances  
186 where data has disappeared from databases without explanation. The New York Times has also  
187 chosen to count patients where they were treated rather than their place of residence and  
188 report on a number of geographic exceptions in their dataset  
189 (<https://github.com/nytimes/covid-19-data>) including the treatment of cities like New York City  
190 and Kansas City and the allocation of cases from cruise ships. Further, there are a subset of  
191 cases where the patient's county of residence cannot or has not yet been identified which is  
192 generally a small fraction of a state's total cases but can be a significant number in a small state  
193 like Rhode Island (Table 1).

194

195 Taken together, these subtleties of the data collection process imply that the COVID-19 data  
196 from The New York Times may not exactly agree with the numbers reported by various state  
197 and county Departments of Public Health. We quantified the consistencies between The New  
198 York Times COVID-19 data and county (Figure 2A, 2B) and state (Figure 2D) Department of  
199 Public Health data and found the datasets to be largely comparable. Based on the exact  
200 agreement, it seems likely that The New York Times is deriving their data for Connecticut  
201 directly from the Connecticut Department of Public Health (Figure 2B).

202

203 The comparison of our estimated hospitalized cases based on the simple model from Ferguson  
204 et al.<sup>7</sup> with state (Figure 2C) and county (Figure 2B) reported hospitalizations revealed a  
205 systematic bias towards increased hospitalizations in our model. We suspect that this bias is  
206 due to a number of factors including time lags between the date of hospitalization and the  
207 results of testing, as well as miscalibration of the assumed 4.4% rate of hospitalization taken  
208 from the Ferguson model<sup>7,8,11</sup>.



209  
210 With the advent of the COVID-19 pandemic we have observed a trend towards government  
211 agencies at the municipal, county, state, and national levels making their data increasingly  
212 accessible for re-use and therefore provide potential value. However, many of the most popular  
213 tools which are built upon this freely available data do not provide their source code for further  
214 development. The Johns Hopkins dashboard<sup>2</sup>, which receives more than 1.2 billion hits per day,  
215 has made their data publicly available<sup>18</sup>, however, the source code for their dashboard is not  
216 made available for further development by third parties. Similarly, the IHME dashboard<sup>19</sup> which  
217 has been referenced by the White House for making policy decisions<sup>20</sup> has had their dashboard  
218 peer reviewed<sup>21</sup>, however, their epidemiological model has yet to be peer reviewed<sup>9</sup>. While  
219 IHME provides open source code on their data aggregation process  
220 (<https://github.com/beoutbreakprepared/nCoV2019>) and some features of their model  
221 including the curve fitting of their projections (<https://github.com/ihmeuw-msca/CurveFit>), the  
222 whole dashboard is not open source. Additionally, many states and counties are using *Tableau*,  
223 a proprietary piece of software, to visualize COVID-19<sup>22</sup> and as of 4/17/2020 there are 1,184  
224 coronavirus dashboards on Tableau public<sup>23</sup>. While Tableau facilitates powerful data  
225 visualization, the software is not open source and requires a license for use. To promote further  
226 development of CovidCounties and fully leverage the available data we have implemented our  
227 website using the commonly used *R* and *Rshiny* frameworks, and made all of our source code  
228 freely available on github (<https://github.com/vivical/ButteLabCOVID>).

229  
230 CovidCounties represents an improvement over existing dashboards in terms of both scope and  
231 granularity. Existing COVID-19 dashboards generally focus either on county level data within a  
232 particular state (primarily at a static timepoint) or at the state level across the United States.  
233 We have developed an intuitive tool that facilitates temporal comparisons between all counties  
234 in the US. However, we are inherently limited by the availability of data. While CovidCounties'  
235 estimation of ICU needs at the county level allows for higher resolution allocation of resources  
236 compared to the widely used state level model from IHME  
237 (<https://covid19.healthdata.org/united-states-of-america>), zip code level data would further

238 improve the value of these estimations for resource allocation. States like Maryland<sup>24</sup>,  
239 Arizona<sup>25</sup>, and South Carolina<sup>26</sup> and counties like Johnson County, Kansas<sup>27</sup>, San Diego County,  
240 California<sup>28</sup>, and King County, Washington<sup>29</sup> have already made zip code level data available.  
241 However, there are many states and counties that are hesitant to provide data of this  
242 granularity due to concerns over privacy thus highlighting the challenge of balancing privacy  
243 with public good.

244

245 A limitation of CovidCounties is the inherent dependence on publicly available data. To date,  
246 most states and counties are primarily providing case and death data with an increasing  
247 number also providing hospitalization data. However, there is a severe lack of testing  
248 information. The lack of testing data limits the ability to make inferences on the infection rate  
249 in the population and the improvement of model trajectories. It has also been proposed that  
250 there has been an under ascertainment of cases especially in the asymptomatic<sup>30</sup>, which can  
251 influence case rates. States and counties are continuously ramping up testing and this sudden  
252 availability of tests can artificially distort counts by attributing individuals who were infected  
253 previously to a later date due to an earlier shortage of tests. These numbers are further  
254 complicated by the wide variety of commercially available tests that rely on different  
255 technologies with varying sensitivity and specificity.

256

257 With its release, [covidcounties.org](https://covidcounties.org) represents a powerful open-source platform to empower  
258 non-data scientists to track the current trends of the COVID-19 pandemic at the county level to  
259 help facilitate policy and healthcare decisions which can help improve outcomes. We welcome  
260 volunteers (both technical and non-technical) to help us to further develop CovidCounties  
261 (<https://covidcounties.org/buttelabcovid/www/volunteers.html>).

262

### 263 **Usage Notes:**

264 A summary of the website features is available from the University of California, San Francisco  
265 [<https://ucsf.app.box.com/v/Covid19Townhall041720>]. A detailed tutorial illustrating use of the  
266 website is available on youtube.com (<https://youtu.be/5OHDSplV1kY>).

267

268 **Code Availability:**

269 The website source code is available on github (<https://github.com/vivical/ButteLabCOVID>). A  
270 version-controlled *Docker* [ref] container is also available on dockerhub  
271 ([https://hub.docker.com/r/pupster90/covid\\_tracker](https://hub.docker.com/r/pupster90/covid_tracker)).

272

273 **Data Availability:**

274 Curated data on the state-wide implementation of social-distancing policies and curated  
275 validation data are hosted on datadryad.com  
276 (<https://datadryad.org/stash/share/whGecW9DWYmoAVMDdAHNF0z712Vbxrj9YwI5QKRAWUs>  
277 ).

278

279 **Contributions:**

280 PB and AJB jointly conceived the initial concept. DA, PB, ME, BO, and RV participated in data  
281 acquisition, software development and website deployment. AM, VAR, and TZ participated in  
282 manual collection and curation of the state governmental policy data. DA, AM, VAR, and TZ  
283 contributed to the initial draft of the manuscript. All authors performed editing for important  
284 intellectual content. PB, AJB, BO, and VAR performed project management and overall  
285 supervision.

286

287 **Acknowledgements:** The authors kindly acknowledge Amazon Web Services for donating the  
288 necessary computing resources for website hosting.

289

290 **Funding support:** Research reported in this publication was supported by funding from the  
291 UCSF Bakar Computational Health Sciences Institute and the National Center for Advancing  
292 Translational Sciences of the National Institutes of Health under award number UL1 TR001872.  
293 VAR was supported by the National Center for Advancing Translational Sciences, National  
294 Institutes of Health, through of the National Institutes of Health grant under award number TL1  
295 TR001871. AJB was supported in part by the National Institute of Allergy and Infectious

296 Diseases (Bioinformatics Support Contract HHSN316201200036W). The content is solely the  
297 responsibility of the authors and does not necessarily represent the official views of the  
298 National Institutes of Health.

299

300 **Competing Interests:** The authors declare no relevant competing interests

301

302

303 **Figures/Table Legends:**

304

305 **Figure 1: Database schematic.**

306 Source data was obtained from The New York Times, US Census Bureau, Kaiser Health News,  
307 and from a manual curation of state governmental websites and news outlets as described in  
308 *Methods*. Data was processed to reflect case and death counts at the level of states and  
309 counties. Functions were written to perform x- and y-axis rescaling, normalization by  
310 population, doubling time estimation, and ICU bed utilization. Results were depicted using  
311 interactive line plots and maps.

312

313 **Figure 2: Technical validation of the datasets.**

314 A. Comparison of estimated ICU bed occupancy, cumulative cases, and cumulative deaths  
315 reported by CovidCounties against corresponding data reported by the California Department  
316 of Public Health. Each point corresponds to a measurement from a given California county on a  
317 particular date where both datasets report counts. Data is from 4/1/2020 - 4/9/2020.

318 B. Comparison of the estimated hospital bed occupancy, cumulative cases, and cumulative  
319 deaths reported by CovidCounties against corresponding data reported by the Connecticut  
320 Department of Public Health. Each point corresponds to a measurement from a given  
321 Connecticut county on a particular date where both datasets report counts. Data is from  
322 3/24/2020 - 4/9/2020.

323 C. Comparison of the estimated hospital bed occupancy, cumulative cases, and cumulative  
324 deaths reported by CovidCounties against corresponding data reported by the website Corona  
325 Data Scraper as of 4/10/2020 (includes data up to 4/9/2020). Each point corresponds to a  
326 measurement from any US county in the dataset at a particular time where both datasets  
327 report counts.

328 D. Comparison of the estimated hospital bed occupancy, cumulative cases, and cumulative  
329 deaths reported by CovidCounties against corresponding data reported by 8 different state

330 Departments of Public Health. Data ranges vary by state; curated state data is available in the  
331 data file accompanying this manuscript.

332

333 **Figure 3: Effect of shelter in place orders on doubling time**

334 A. States within the United States are color-coded by percentile of date to implement state  
335 mandated shelter in place. White indicates earlier dates (among states) while dark orange  
336 indicates later dates or no state mandate.

337 B. States within the United States are color-coded by percentile of case doubling time on April  
338 15, 2020. Dark orange indicates a fast doubling time (among states), white indicates a slow  
339 doubling time.

340

341 **Figure 4: Overview of CovidCounties.org.**

342 A. The primary view of CovidCounties.org is the line plot view, depicting time-series trends by  
343 individual county. Depicted counties may be selected by single or double clicking the counties  
344 displayed in the legend. They may also be selected by typing in counties (including from outside  
345 of a given state) at the bottom.

346 B. User-selected individual states are color coded according to the variable of interest (e.g.  
347 cumulative cases). Dark orange corresponds to the highest percentiles within the state, white  
348 indicates the lowest percentile. Hovering functionality displays statistics corresponding to a  
349 given county.

350 C. Line plot views can be extensively customized, with features to enable axis re-  
351 centering/scaling, count normalization, depiction of doubling time, and predicted ICU bed  
352 utilization. Individual state and United States plots update to reflect selected parameters where  
353 appropriate.

354 D. States within the United States are color-coded by percentile according to the variable of  
355 interest (e.g. cumulative cases). Dark orange indicates relatively high percentile (among states),  
356 white indicates low percentile. Hovering functionality displays statistics corresponding to a  
357 given state. The dropdown menu below allows the user to change the view to depict timing

358 that various social distancing policies were implemented: white indicates relatively early  
359 adoption (by percentile), dark orange indicates late or no current adoption.

360 **Table 1: Descriptive statistics on the included data sets.**

*New York Times*

|                                                     |                                      |                                           |                                     |
|-----------------------------------------------------|--------------------------------------|-------------------------------------------|-------------------------------------|
| <i>% of counties with non-missing data†</i>         | 85.8%                                |                                           |                                     |
| <i>States with greatest % of counties reporting</i> | 17 counties tied at 100%*            |                                           |                                     |
| <i>States with lowest % of counties reporting</i>   | Alaska (37.9% - 11/29)               | Montana (50% - 28/56)                     | Nebraska (50.5% - 47/93)            |
| <i>States with highest % of unknown cases</i>       | Rhode Island (23.3%; 756; 715)       | Connecticut (3.8%; 533; 149)              | Arkansas (3.0%; 45; 15)             |
| <i>Counties with highest cases per million</i>      | Rockland, New York (25,591)          | Westchester, New York (20,867)            | Blaine, Idaho (20,265)              |
| <i>Counties with the fastest doubling times</i>     | Louisa, Iowa (1.13 days)             | Walker, Texas (1.20 days)                 | Isle of Wight, Virginia (1.40 days) |
| <i>Counties with highest estimated ICU needs</i>    | Rockland, New York (2,146% - 837/39) | Westchester, New York (1,166% - 2087/179) | Eagle, Colorado (985% - 49/5)       |

361

*Kaiser Health News*

|                                                     |                                 |                               |                                 |
|-----------------------------------------------------|---------------------------------|-------------------------------|---------------------------------|
| <i>% of counties with non-missing ICU beds</i>      | 45.0%                           |                               |                                 |
| <i>Counties with most ICU beds</i>                  | Los Angeles, California (2,126) | Cook, Illinois (1,606)        | New York City, New York (1,592) |
| <i>Counties with the most ICU beds per million</i>  | Otero, Colorado (27,452)        | Montour, Pennsylvania (2,303) | Emmet, Michigan (1,741)         |
| <i>Counties with the least ICU beds per million</i> | Wright, Minnesota (22)          | Clinton, Michigan (25.2)      | Stafford, Virginia (26.7)       |

362

*Policy Data*

|                                                             |                             |                                             |                                        |
|-------------------------------------------------------------|-----------------------------|---------------------------------------------|----------------------------------------|
| <i>% of states with non-missing data for all 4 policies</i> | 60.8%                       |                                             |                                        |
| <i>First to declare state of emergency</i>                  | Washington (2/29/2020)      | California (3/4/2020)                       | Hawaii & Maryland (3/5/2020)           |
| <i>First to close public schools</i>                        | Kentucky & Ohio (3/12/2020) | Delaware, Virginia & W Virginia (3/13/2020) | Arizona, Iowa, Nevada & NH (3/15/2020) |
| <i>First to declare shelter in place</i>                    | Arizona (3/11/2020)         | California (3/19/2020)                      | Connecticut (3/20/2020)                |
| <i>First to close restaurants and bars</i>                  | Ohio (3/15/2020)            | 12 states** on (3/16/2020)                  | 9 states*** on (3/17/2020)             |

363



364 Data reported as of 4/16/2020. States with highest % of unknown cases shows the percent of  
365 cases from unknown counties as a fraction of total cases in the state, the absolute number of  
366 cases from unknown counties in the state, and the cases per million from unknown counties in  
367 the state. States with lowest % of counties reporting shows the percentage of counties  
368 reporting, the number of counties reporting, and total counties in the state. Counties with  
369 highest estimated ICU needs shows the ICU needs as a percentage based on the estimated  
370 number of ICU beds needed and KHN reported number of ICU beds.

371 † In the NY Times data all counties that reported cases also reported deaths (or were assumed  
372 to be 0)

373 \* AL, AZ, CT, DE, DC, FL, IN, LA, MD, MA, NH, NJ, NY, PA, RI, SC, VT

374 \*\* CA, CT, DE, DC, KY, LA, MI, NJ, NY, PA, RI, WA

375 \*\*\* CO, IL, IN, IA, MA, MN, NC, OR, VT

376

377 **Figure 1**

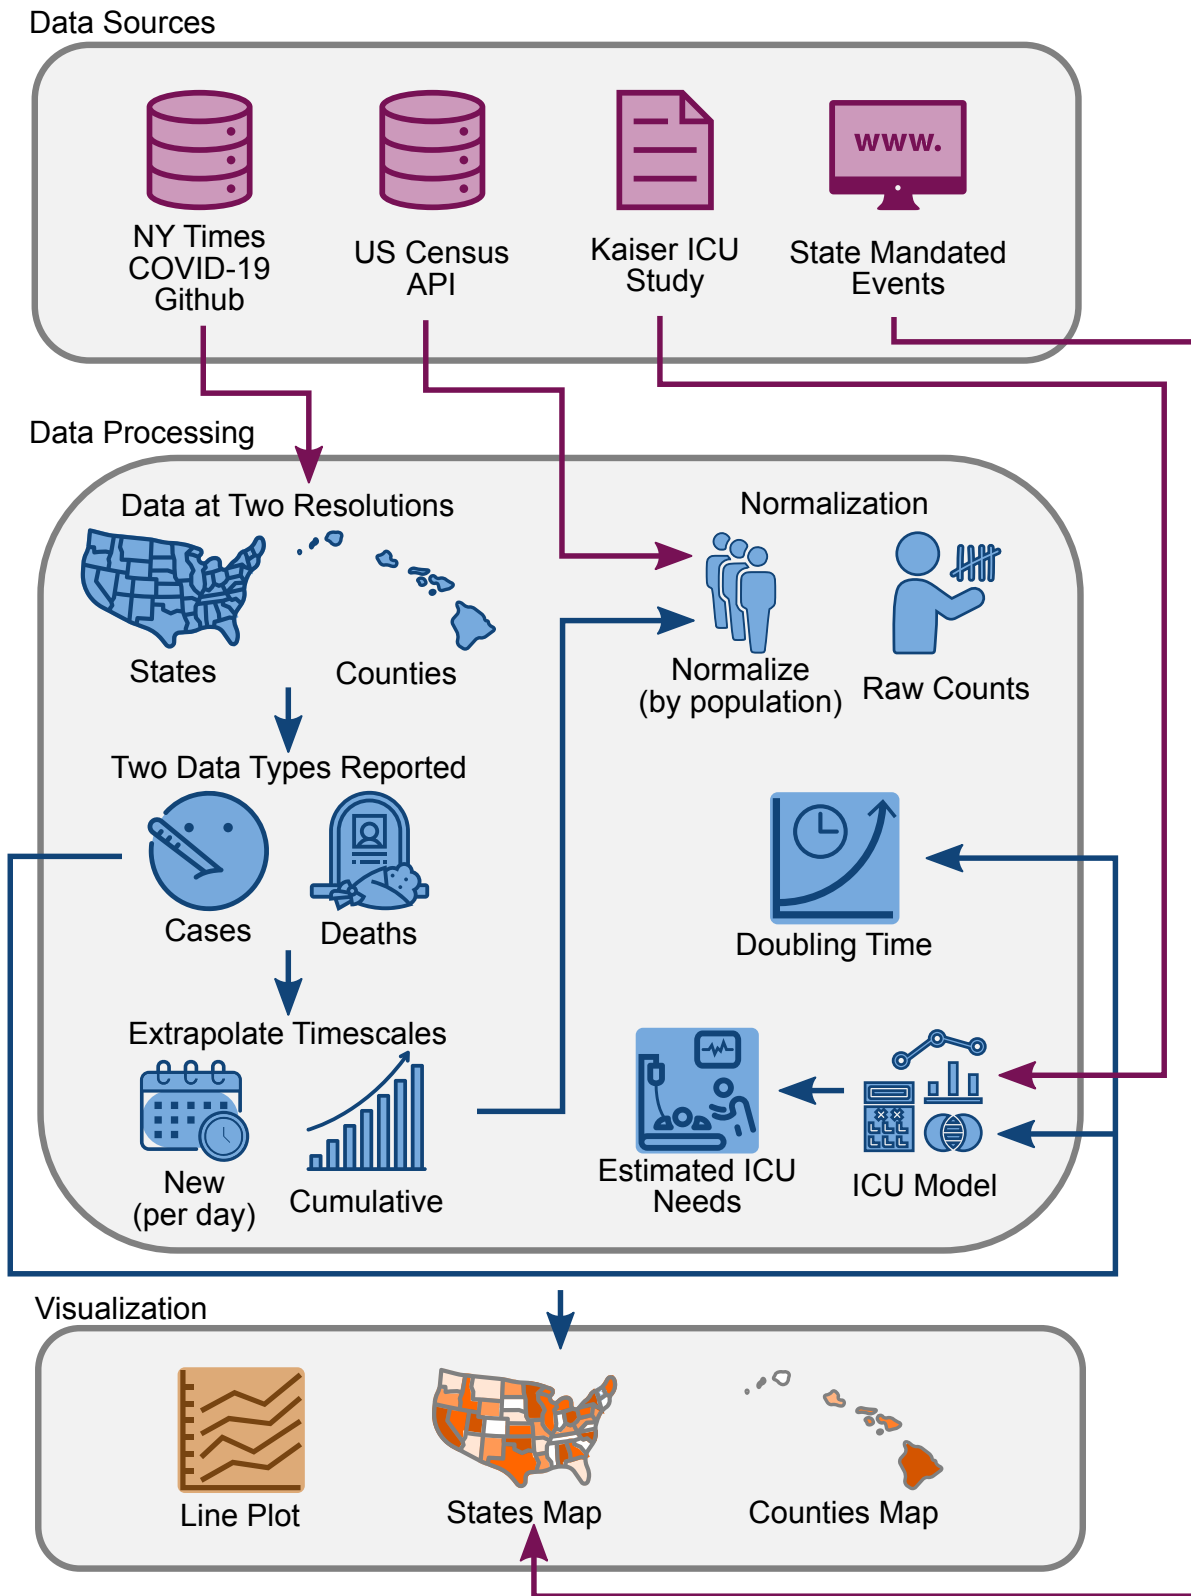

378

379 **Figure 2**

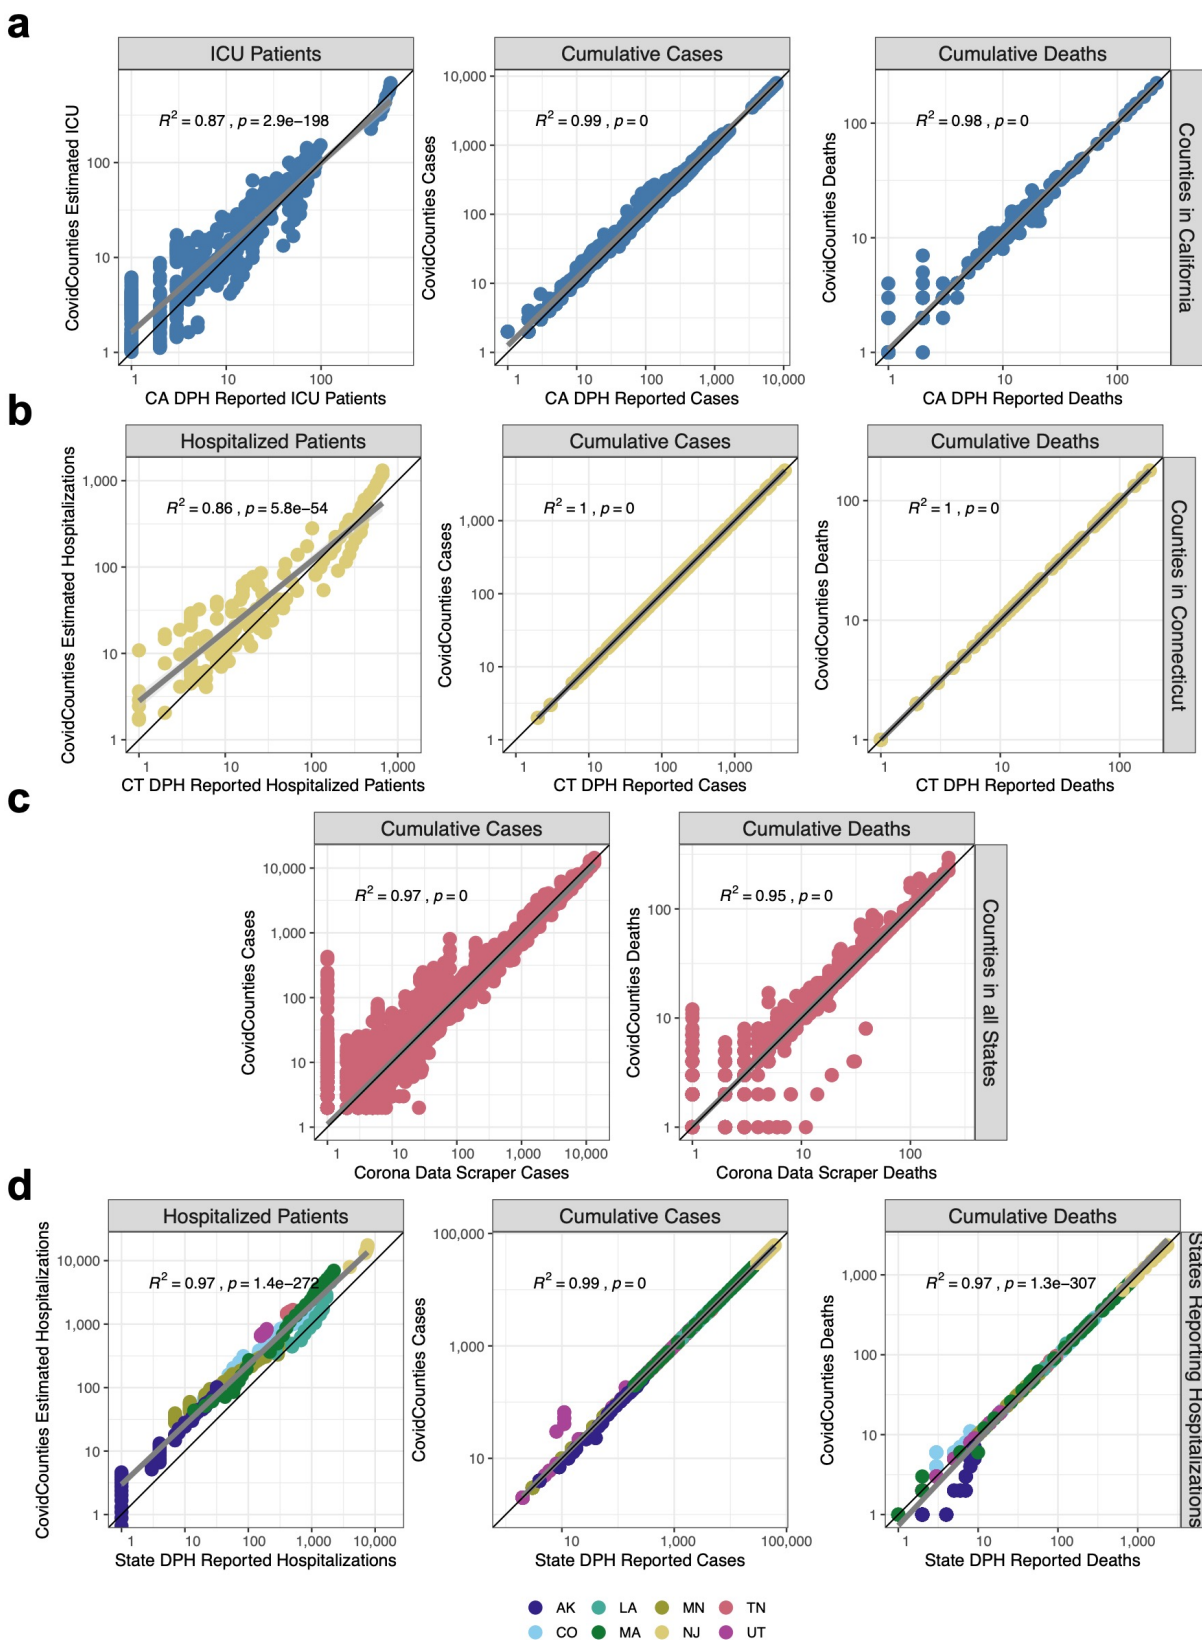

380

381 **Figure 3**

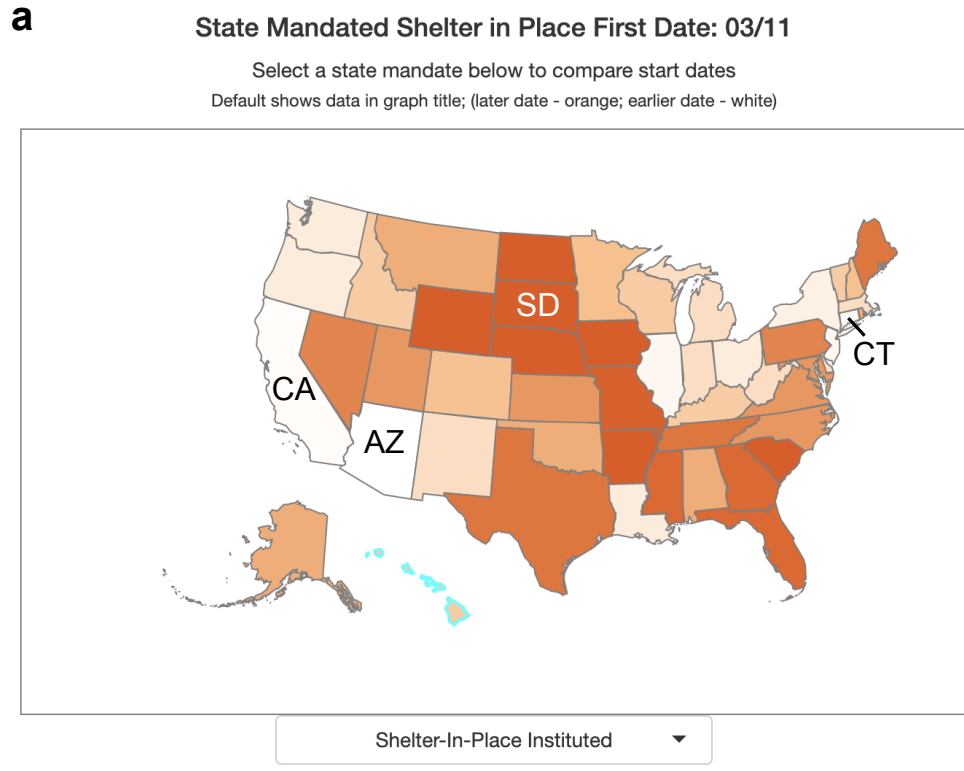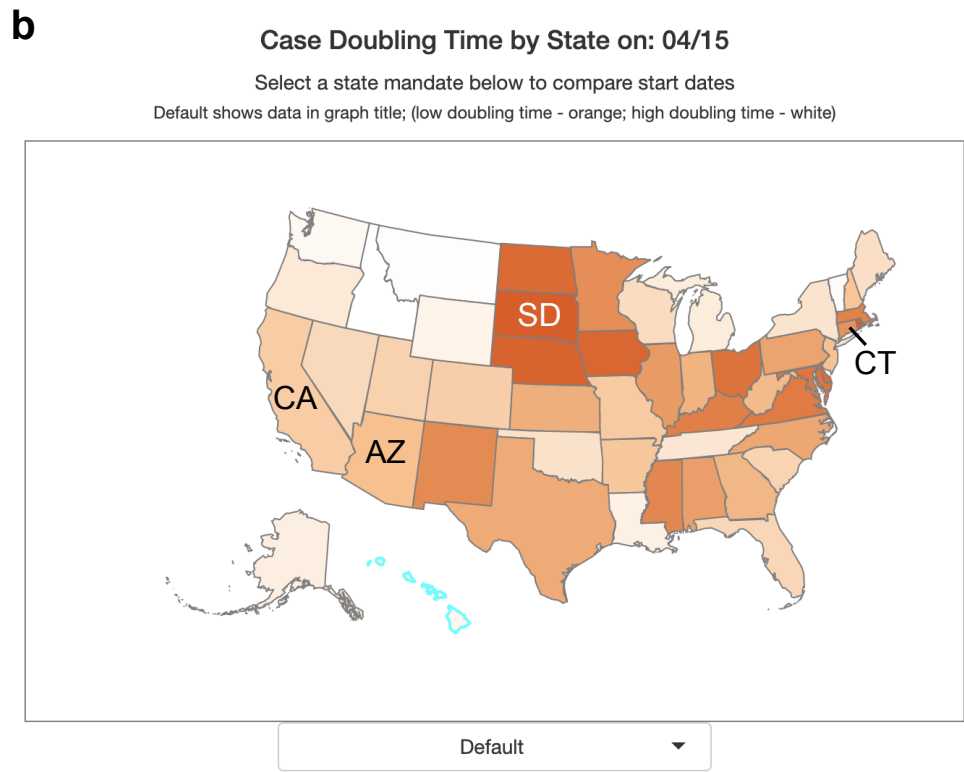

382

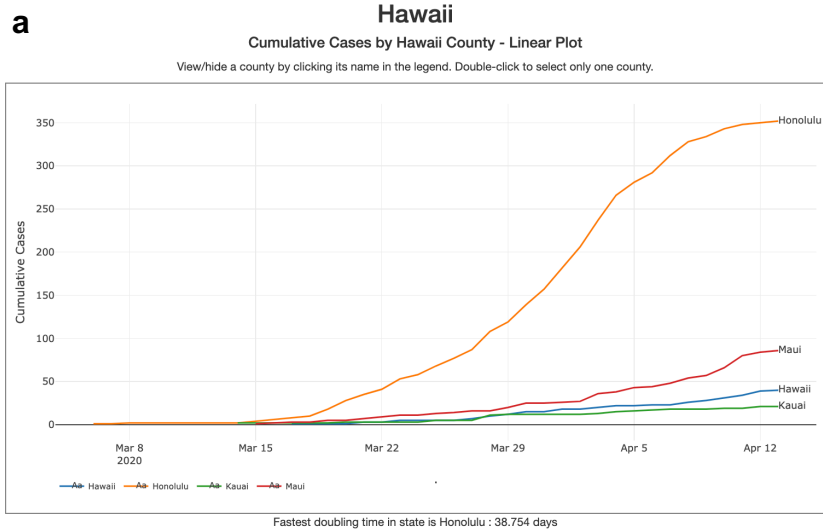

Select Counties:

Select a state:

**c**

**Plot by:**

- Total cases
- Total deaths
- New cases
- New deaths
- Doubling time
- Estimated ICU bed utilization

**Time Scale**

- Aligned (since first 10 cases)
- Actual dates

**Scale by Population Density:**

- True
- False

**Y-Axis:**

- Linear
- Log

**Include counties with more cases than:**

**Date Range (some data streams begin as early as 1/21/2020):**  -

**b** Cumulative Cases by Hawaii County from: 03/01 - 04/13

Percentile ranks are relative to counties within the state  
(high number of cases - orange; low number of cases - white)

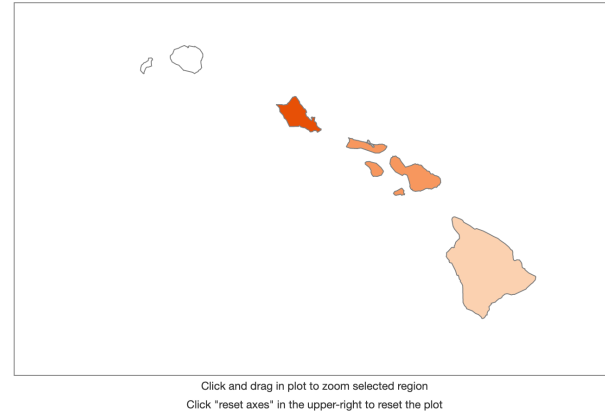

**d** Cumulative Cases by State from: 03/01 - 04/13

Select a state mandate below to compare start dates  
Default shows data in graph title; (high number of cases - orange; low number of cases - white)

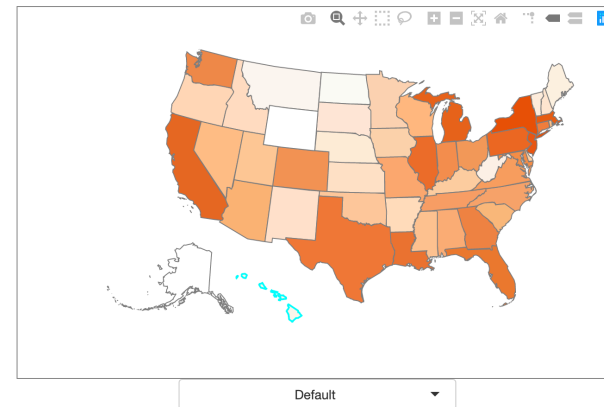

385 **References:**

386

- 387 1. World Health Organization. Novel Coronavirus – China. [https://www.who.int/csr/don/12-](https://www.who.int/csr/don/12-january-2020-novel-coronavirus-china/en/)  
388 [january-2020-novel-coronavirus-china/en/](https://www.who.int/csr/don/12-january-2020-novel-coronavirus-china/en/) (2020).
- 389 2. Center for Systems Engineering and Science at Johns Hopkins. COVID-19 Dashboard.  
390 *Coronavirus Resource Center* <https://coronavirus.jhu.edu/map.html> (2020).
- 391 3. The New York Times. Coronavirus (Covid-19) Data in the United States.  
392 <https://github.com/nytimes/covid-19-data> (2020).
- 393 4. The U.S. Census Bureau. U.S. Census Bureau’s 2014-2018 American Community Survey 5-year  
394 estimates. <https://www.census.gov/data/developers/data-sets/acs-5year.html> (2020).
- 395 5. Walker, K. tidy census: Load US Census Boundary and Attribute Data as ‘tidyverse’ and ‘sf’-  
396 Ready Data Frames. R package version 0.9.6. <https://CRAN.R-project.org/package=tidy census>  
397 (2020).
- 398 6. Kaiser Health News. Millions Of Older Americans Live In Counties With No ICU Beds As  
399 Pandemic Intensifies. [https://khn.org/news/as-coronavirus-spreads-widely-millions-of-older-](https://khn.org/news/as-coronavirus-spreads-widely-millions-of-older-americans-live-in-counties-with-no-icu-beds/)  
400 [americans-live-in-counties-with-no-icu-beds/](https://khn.org/news/as-coronavirus-spreads-widely-millions-of-older-americans-live-in-counties-with-no-icu-beds/) (2020).
- 401 7. Ferguson, N. M. *et al.* Report 9: Impact of non-pharmaceutical interventions (NPIs) to reduce  
402 COVID-19 mortality and healthcare demand. [https://www.imperial.ac.uk/media/imperial-](https://www.imperial.ac.uk/media/imperial-college/medicine/sph/ide/gida-fellowships/Imperial-College-COVID19-NPI-modelling-16-03-2020.pdf)  
403 [college/medicine/sph/ide/gida-fellowships/Imperial-College-COVID19-NPI-modelling-16-03-](https://www.imperial.ac.uk/media/imperial-college/medicine/sph/ide/gida-fellowships/Imperial-College-COVID19-NPI-modelling-16-03-2020.pdf)  
404 [2020.pdf](https://www.imperial.ac.uk/media/imperial-college/medicine/sph/ide/gida-fellowships/Imperial-College-COVID19-NPI-modelling-16-03-2020.pdf) (2020).
- 405 8. Predictive Healthcare at Penn Medicine. COVID-19 Hospital Impact Model for Epidemics  
406 (CHIME). <https://penn-chime.phl.io/> (2020).
- 407 9. IHME COVID-19 Health Service Utilization Forecasting Team. Forecasting COVID-19 impact on  
408 hospital bed-days, ICU-days, ventilator-days and deaths by US state in the next 4 months.  
409 *Medrxiv* 2020.03.27.20043752 (2020) doi:10.1101/2020.03.27.20043752.
- 410 10. Enns, E. A. *et al.* Modeling the Impact of Social Distancing Measures on the spread of SARS-  
411 CoV-2 in Minnesota. [https://mn.gov/covid19/assets/MNmodel\\_tech\\_doc\\_tcm1148-427724.pdf](https://mn.gov/covid19/assets/MNmodel_tech_doc_tcm1148-427724.pdf)  
412 (2020).
- 413 11. Biocomplexity Institute & Initiative University of Virginia. Estimation of COVID-19 Impact in  
414 Virginia. [https://covid19.biocomplexity.virginia.edu/sites/covid19.biocomplexity/files/COVID-](https://covid19.biocomplexity.virginia.edu/sites/covid19.biocomplexity/files/COVID-19-UVA-MODEL-FINDINGS-Apr13-2020-FINAL%20PRESS.pdf)  
415 [19-UVA-MODEL-FINDINGS-Apr13-2020-FINAL%20PRESS.pdf](https://covid19.biocomplexity.virginia.edu/sites/covid19.biocomplexity/files/COVID-19-UVA-MODEL-FINDINGS-Apr13-2020-FINAL%20PRESS.pdf) (2020).
- 416 12. R Core Team. R: A language and environment for statistical computing. R Foundation for  
417 Statistical Computing, Vienna, Austria. <https://www.R-project.org/> (2019).
- 418 13. Chang, W., Cheng, J., Allaire, J., Xie, Y. & McPherson, J. shiny: Web Application Framework  
419 for R. R package version 1.4.0. <https://CRAN.R-project.org/package=shiny> (2019).
- 420 14. Attali, D. shinyjs: Easily Improve the User Experience of Your Shiny Apps in Seconds. R  
421 package version 1.1. <https://CRAN.R-project.org/package=shinyjs> (2020).
- 422 15. Wickham, H. *et al.* Welcome to the Tidyverse. *J Open Source Softw* **4**, 1686 (2019).
- 423 16. Sievert, C. plotly for R. <https://plotly-r.com> (2018).
- 424 17. AP News. South Dakota COVID cases top 1,100; meat plant worker dies.  
425 <https://apnews.com/b20cd0c7c71b828eb164fbc069050aac> (2020).
- 426 18. Dong, E., Du, H. & Gardner, L. An interactive web-based dashboard to track COVID-19 in real  
427 time. *Lancet Infect Dis* (2020) doi:10.1016/s1473-3099(20)30120-1.

- 428 19. IHME. COVID-19 Projections. <https://covid19.healthdata.org/united-states-of-america>  
429 (2020).
- 430 20. Ripley, B. Our COVID-19 forecasting model, otherwise known as “the Chris Murray Model”.  
431 [http://www.healthdata.org/acting-data/our-covid-19-forecasting-model-otherwise-known-](http://www.healthdata.org/acting-data/our-covid-19-forecasting-model-otherwise-known-chris-murray-model)  
432 [chris-murray-model](http://www.healthdata.org/acting-data/our-covid-19-forecasting-model-otherwise-known-chris-murray-model) (2020).
- 433 21. Xu, B. *et al.* Epidemiological data from the COVID-19 outbreak, real-time case information.  
434 *Sci Data* **7**, 106 (2020).
- 435 22. Anzilotti, E. How governments are using Tableau to keep you up-to-date on the coronavirus.  
436 [https://www.tableau.com/about/blog/2020/4/how-governments-are-using-tableau-keep-you-](https://www.tableau.com/about/blog/2020/4/how-governments-are-using-tableau-keep-you-date-coronavirus)  
437 [date-coronavirus](https://www.tableau.com/about/blog/2020/4/how-governments-are-using-tableau-keep-you-date-coronavirus) (2020).
- 438 23. Tableau Public. <https://public.tableau.com/search/all/%23coronavirus> (2020).
- 439 24. Maryland Department of Public Health. Coronavirus Disease 2019 (COVID-19) Outbreak.  
440 <https://coronavirus.maryland.gov/> (2020).
- 441 25. Arizona Department of Health Services. Confirmed Covid-19 Cases by Zip Code.  
442 [https://adhs.gis.maps.arcgis.com/apps/opsdashboard/index.html#/84b7f701060641ca8bd9ea0](https://adhs.gis.maps.arcgis.com/apps/opsdashboard/index.html#/84b7f701060641ca8bd9ea0717790906)  
443 [717790906](https://adhs.gis.maps.arcgis.com/apps/opsdashboard/index.html#/84b7f701060641ca8bd9ea0717790906) (2020).
- 444 26. South Carolina Department of Health and Environmental Control. SC Cases by County & ZIP  
445 Code (COVID-19). [https://scdhec.gov/infectious-diseases/viruses/coronavirus-disease-2019-](https://scdhec.gov/infectious-diseases/viruses/coronavirus-disease-2019-covid-19/sc-cases-county-zip-code-covid-19)  
446 [covid-19/sc-cases-county-zip-code-covid-19](https://scdhec.gov/infectious-diseases/viruses/coronavirus-disease-2019-covid-19/sc-cases-county-zip-code-covid-19) (2020).
- 447 27. Johnson County Kansas AIMS. Johnson County, KS - COVID-19 Update.  
448 [https://public.tableau.com/profile/mapper.of.the.day.mod.#/vizhome/covid19\\_joco\\_public/D](https://public.tableau.com/profile/mapper.of.the.day.mod.#/vizhome/covid19_joco_public/Dashboard)  
449 [ashboard](https://public.tableau.com/profile/mapper.of.the.day.mod.#/vizhome/covid19_joco_public/Dashboard) (2020).
- 450 28. County of San Diego Health and Human Services Agency. County of San Diego Daily  
451 Coronavirus Disease 2019 (COVID-19) Summary of Cases by Zip Code of Residence.  
452 [https://www.sandiegocounty.gov/content/dam/sdc/hhsa/programs/phs/Epidemiology/COVID-](https://www.sandiegocounty.gov/content/dam/sdc/hhsa/programs/phs/Epidemiology/COVID-19%20Summary%20of%20Cases%20by%20Zip%20Code.pdf)  
453 [19%20Summary%20of%20Cases%20by%20Zip%20Code.pdf](https://www.sandiegocounty.gov/content/dam/sdc/hhsa/programs/phs/Epidemiology/COVID-19%20Summary%20of%20Cases%20by%20Zip%20Code.pdf) (2020).
- 454 29. Seattle and King County Public Health. King County COVID-19 outbreak summary.  
455 [https://kingcounty.gov/depts/health/communicable-diseases/disease-control/novel-](https://kingcounty.gov/depts/health/communicable-diseases/disease-control/novel-coronavirus/data-dashboard.aspx)  
456 [coronavirus/data-dashboard.aspx](https://kingcounty.gov/depts/health/communicable-diseases/disease-control/novel-coronavirus/data-dashboard.aspx) (2020).
- 457 30. Omori, R., Mizumoto, K. & Nishiura, H. Ascertainment rate of novel coronavirus disease  
458 (COVID-19) in Japan. *Medrxiv* 2020.03.09.20033183 (2020) doi:10.1101/2020.03.09.20033183.
